# **A gradient of Wnt activity positions the neurosensory domains of the inner ear**

Magdalena Žak <sup>1\*</sup>, Vincent Plagnol <sup>2</sup> and Nicolas Daudet <sup>1\*</sup>

<sup>1</sup> UCL Ear Institute, University College London, London WC1X 8EE, UK

<sup>2</sup> Genetics Institute, University College London, London WC1E 6AA, UK

\* Corresponding authors: [n.daudet@ucl.ac.uk](mailto:n.daudet@ucl.ac.uk), [m.zak@ucl.ac.uk](mailto:m.zak@ucl.ac.uk)

## **Abstract**

The auditory and vestibular organs of the inner ear and the neurons that innervate them originate from Sox2-positive and Notch-active neurosensory domains specified at early stages of otic development. Sox2 is initially present throughout the otic placode and otocyst, then it becomes progressively restricted to a ventro-medial domain. Using gain and loss-of-function approaches in the chicken otocyst, we show that these early changes in Sox2 expression are regulated in a dose-dependent manner by Wnt/beta-catenin signalling. Both high and very low levels of Wnt activity repress Sox2 and neurosensory competence. However, intermediate levels allow the maintenance of Sox2 expression and sensory organ formation. We propose that a dorso-ventral (high-to-low) gradient and wave of Wnt activity initiated at the dorsal rim of the otic placode progressively restricts Sox2 and Notch activity to the ventral half of the otocyst, thereby positioning the neurosensory competent domains in the inner ear.

The inner ear is composed of several sensory organs populated with specialised mechanosensory ‘hair’ cells and their supporting cells. The vestibular system forms the dorsal part of the inner ear and contains the utricle, the saccule, and three semi-circular canals and their associated cristae responsible for the perception of head position and acceleration. The cochlear duct, which extends from the ventral aspect of the inner ear, contains an auditory epithelium called the organ of Corti in mammals, or the basilar papilla in birds and reptiles. All of these sensory organs originate from ‘prosensory domains’ that are specified in the early otocyst, a vesicle-like structure that derives from the otic placode.

The prosensory domains emerge from a population of sensory-competent cells organised in a broad antero-posterior domain along the medial wall of the otocyst. The signals controlling their specification involve a combination of cell intrinsic factors and cell-to-cell signalling pathways. The High Mobility Group (HMG) transcription factor Sox2 is considered the key prosensory factor, since its absence abolishes sensory organ formation<sup>1, 2, 3</sup>. Sox2 is initially expressed in a large portion of the otocyst then becomes progressively restricted to two distinct prosensory domains in its anterior and posterior regions<sup>4</sup>. The anterior domain is neuro-sensory competent: it forms several vestibular sensory epithelia (the anterior and lateral crista; the macula of the utricle) by segregation and the otic neuroblasts, which delaminate from the epithelium to differentiate into the auditory and vestibular neurons<sup>4, 5, 6, 7, 8, 9</sup>. The posterior one, in contrast, is non-neurogenic and thought to generate the posterior crista only. The auditory sensory patch (the organ of Corti in mammal or basilar papilla in birds) is specified after the vestibular organs<sup>6</sup> but the otic territory from which it derives is ill-defined.

The factors regulating Sox2 expression during early otic development are likely to play a key role in the control of the timing and spatial pattern of sensory organ formation. For example, Notch-mediated lateral induction, dependent on the Notch ligand Jagged 1 (Jag1), is required for the maintenance of Sox2 expression and sensory organ formation<sup>10, 11, 12, 13, 14, 15</sup>. Forcing Notch activity leads to the formation of ectopic sensory patches<sup>3, 14, 16, 17, 18</sup>, suggesting that it is one of the key factors maintaining Sox2 and prosensory competence (reviewed in<sup>19</sup>). Another candidate regulator of prosensory specification is Wnt signalling, which relies on interactions between soluble Wnt ligands and their transmembrane Frizzled receptors to activate canonical and non-canonical branches of the Wnt pathway<sup>20</sup>. Beta-catenin ( $\beta$ -catenin) is the key element in the intracellular cascade of canonical Wnt signalling. When Wnt signalling is active,  $\beta$ -catenin escapes degradation and moves to the nucleus where it interacts with transcription factors to regulate the expression of Wnt target genes. Previous studies have shown that Wnt activity is elevated in the dorsal aspect of the otocyst

and is required for vestibular system morphogenesis<sup>21, 22</sup>, but its role in the context of prosensory specification is still unclear.

In this study, we investigated the roles of Wnt signalling in the embryonic chicken otocyst and its potential interactions with Notch signalling. We show that a (high to low) gradient of Wnt activity exists along the dorso-ventral axis of the otocyst. By co-transfecting reporters of Notch or Wnt activity with modulators of these pathways, we found that manipulation of Notch activity does not impact on Wnt signalling. In contrast, high levels of Wnt activity repress neurosensory specification and Jag1-Notch signalling. The consequences of inhibiting Wnt signalling were strikingly different along the dorso-ventral axis of the otocyst: in dorsal regions, it induced ectopic neurosensory territories, whilst in the ventral domains, it repressed Sox2 expression, suggesting that low levels of Wnt activity are required for prosensory specification. Using pharmacological treatments in organotypic cultures of otocysts, we show that Wnt activity regulates the expression of a large repertoire of genes implicated in neurosensory specification. Furthermore, in ovo inhibition of Wnt activity can also trigger delamination of ectopic neuroblasts from the otocyst. Altogether, these data suggest that a dorso-ventral gradient of Wnt signalling acts upstream of Notch to position, in a dose-dependent manner, the neurosensory-competent domains of the otocyst.

## Results

### Canonical Wnt activity forms a dorso-ventral gradient in the otocyst and is reduced in neurogenic and prosensory domains

To examine the spatial pattern of Wnt activity during early prosensory specification, we electroporated the otic cup of E2 chicken embryos with a Wnt reporter plasmid 5TCF::H2B-RFP, containing 5 TCF binding sites (upstream of a minimal TK promoter) regulating the expression of a red fluorescent protein fused with Histone 2B (H2B-RFP) (**Fig. 1a**). A control EGFP expression vector was co-electroporated to visualise all transfected cells. In all of the samples analysed at E3 (n>12), RFP expression was confined to the dorsal 2/3 of the otocyst (**Fig. 1b-b'**) on both medial and lateral walls (**Sup. Movie 1**). Wnt ligands can diffuse and elicit spatial gradients of Wnt activity in some tissues<sup>23, 24</sup>. To test if this might be the case in the otocyst, we quantified reporter fluorescence intensity in individual cell nuclei according to their X and Y coordinates (**Fig. 1c**, total of 7322 cell in 7 samples). The results showed that cells with high Wnt activity occupy the dorso-posterior domain of the otocyst and those with low (or no) activity its ventral portion (**Fig. 1c**). To confirm the presence of

this Wnt gradient, we calculated the median intensity values of groups of nuclei located at 10 different levels along the dorso-ventral axis (**Fig. 1d**). The plot revealed a relatively linear decrease in fluorescence, suggesting that cells located at different dorso-ventral positions are exposed to distinct Wnt activity levels.

At E2-E3, Notch is active in the anterior neurosensory competent domain of the otocyst where it regulates the production of otic neuroblasts by lateral inhibition. To examine the relation between the spatial patterns of Wnt and Notch activities, we co-electroporated fluorescent Wnt and Notch reporters in the E2 chicken (**Fig. 1e**). The Notch reporter T2-Hes5::nd2EGFP consisted of a mouse Hes5 promoter driving the expression of a nuclear and destabilised EGFP<sup>25</sup>. In samples collected 24h after electroporation, we observed an overlap between Wnt and Notch reporters at the dorsal border of the anterior neurosensory-competent domain (n>5) (**Fig. 1e**). However, closer examination of 5 of the samples revealed an inverse correlation between the fluorescence levels of Wnt and Notch reporters within transfected cells, suggesting a potential antagonism between Wnt and Notch activity (**Fig. 1e'-e'''**).

#### Wnt activity antagonises Notch signalling in the otocyst

To test the interactions between Wnt and Notch signalling, we used gain (GOF) and loss-of-function (LOF)  $\beta$ -catenin constructs: a full-length constitutively active  $\beta$ -catenin carrying the S35Y mutation ( $\beta$ cat-GOF) to induce Wnt activity; a truncated form of  $\beta$ -catenin composed of the Armadillo domain only to block Wnt ( $\beta$ cat-LOF) (**Fig. 2a**). To validate their effects, we co-transfected these with the Wnt reporter at E2 and examined the otocysts 24 hours later. Compared to control conditions (**Fig. 2b-b'**),  $\beta$ cat-GOF led to a clear expansion of the Wnt reporter fluorescence in the ventral otocyst (n=6) (**Fig. 2c-c'**). Conversely, overexpressing  $\beta$ cat-LOF strongly reduced Wnt reporter fluorescence (n=6) (**Fig. 2d-d'**). Having confirmed the ability of these constructs to activate or inhibit canonical Wnt signalling, we next examined their impact on Notch activity.

In control experiments, the Notch reporter T2-Hes5::nd2EGFP was activated in the anterior neurosensory domain, with few cells with weaker Notch activity present in the posterior prosensory domain (**Fig. 2e-e'**). After co-electroporation with the  $\beta$ cat-LOF construct, Notch activity expanded beyond the prosensory domains and in the dorsal otocyst (n=5) (**Fig. 2f-f'**). In contrast, co-electroporation with the  $\beta$ cat-GOF construct strongly decreased Notch activity so that only a few Notch-active cells were detected within the anterior domain (n=5) (**Fig. 2g-g'**). To test if Notch activity could reciprocally regulate Wnt signalling, we co-transfected the Wnt reporter with constructs previously shown to activate (chicken Notch 1 intracellular domain or NICD1, see<sup>16</sup>) or

block (dominant-negative form of human Mastermind-like1 or DN-MAML1, see <sup>26</sup>) Notch activity. The intensity or expression pattern of Wnt reporter in response to manipulations in Notch activity remained very similar to that of controls (**Sup. Fig. 2**). Altogether, these results show that canonical Wnt signalling antagonises Notch activity in the otocyst, whilst Notch does not appear to affect the levels and spatial pattern of Wnt activity.

## **Genetic manipulation of Wnt activity disrupts prosensory specification in a location-specific manner**

We next tested the effects of manipulating Wnt activity on prosensory specification. Samples electroporated at E2 were collected at E4, then immunostained for Jag1 and Sox2. In controls, Jag1 and Sox2 were detected in the anterior and posterior prosensory domains and within a U-shaped band of cells extending in between these two domains in the ventral half of the otocyst (**Fig. 3a-a''**). The overexpression of  $\beta$ cat-GOF repressed, in a cell-autonomous manner, Jag1 and Sox2 in neurosensory competent cells but did not induce any change in the dorsal region of the otocyst (n=6) (**Fig. 3b-c''**). In contrast,  $\beta$ cat-LOF induced the formation of ectopic prosensory patches in the dorsal otocyst (n=6) (**Fig. 3d-d''**). All ectopic patches were positive for Sox2, but only some expressed Jag1 (**Fig. 3e-e''**). The ability of  $\beta$ cat-LOF to induce ectopic prosensory territories dorsally was dependent on functional Notch signalling. In fact, very few ectopic patches formed in samples co-transfected with  $\beta$ cat-LOF and DN-MAML1 (**Sup. Fig. 3a-b'''**). In the ventral otocyst, however, the consequences of inhibiting Wnt signalling were radically different:  $\beta$ cat-LOF transfected cells exhibited a loss of Jag1 and Sox2 expression (**Fig. 3f-g''**), suggesting a loss of prosensory character (n=6).

To assess the long-term consequences of these manipulations, we incubated some of the embryos electroporated at E2 with transposon vectors (allowing stable integration of the transgenes) until E7, a stage when individualized sensory organs can be easily identified. Transfected inner ears were immunostained for Sox2 and two proteins expressed in differentiated hair cells: Myosin7a (Myo7a), an unconventional myosin expressed in hair cell cytoplasm and the hair cell antigen (HCA), a protein tyrosine phosphatase receptor expressed in hair cell bundles <sup>27, 28</sup>. In control EGFP-transfected samples, inner ear morphology was normal and hair cells were detected in the vestibular organs (the saccule, utricle and the 3 cristae) but not in the basilar papilla extending within the ventral cochlear duct (**Fig. 4a-4a''**). Severe malformations were observed upon transfection with the  $\beta$ cat-GOF construct: 4 out of 5 samples analysed lacked some of the vestibular organs; the remaining patches were small and abnormally shaped but populated with hair cells (**Fig. 4b-c''**). The basilar papilla was either shortened or missing in 4 samples. Surprisingly, the EGFP signal of the two  $\beta$ cat-GOF constructs (cloned in Piggybac and Tol2 vectors) tested for these experiments was seen 24h post-

electroporation but not at E7, suggesting that the transfected cells might have been eliminated from the epithelium by this stage (**Fig. 4b-c**). Long-term overexpression of  $\beta$ cat-LOF (using RCAS or Tol2 vectors) severely altered the morphogenesis of the inner ear ( $n>6$ ) (**Fig. 4d-d'**). Many ectopic Sox2-positive patches of various sizes occupied the dorsal region of the inner ear (**Fig. 4d-d'**). These were populated by hair cells (**Fig. 4e-e''**), suggesting that the ectopic (dorsal) prosensory patches observed at E4 in  $\beta$ cat-LOF conditions can differentiate into mature sensory territories. In contrast, the loss of Wnt activity in ventral regions blocked the formation of the cochlear duct and basilar papilla (**Fig. 4d-d''**). The only Sox2-positive cells remaining in the ventral region of the inner ear were untransfected; they formed small patches surrounded by Sox2-negative cells transfected with the  $\beta$ cat-LOF construct (**Fig. 4f-f''**).

Altogether, these results show that the early and sustained manipulation of Wnt activity affects the formation of the sensory organs and inner ear morphogenesis. The overactivation of Wnt signalling antagonizes prosensory specification and may compromise long-term cell viability. On the other hand, reducing Wnt activity induces prosensory character dorsally, whilst in ventral regions it represses it. In light of the endogenous high-to-low gradient of canonical Wnt activity along the dorso-ventral axis of the otocyst, one possible explanation for these dual effects is that Wnt signalling regulates prosensory specification in a dose-dependent manner: high levels of canonical Wnt activity (dorsally) repress it, but low levels (ventrally) are however necessary for cells to acquire or maintain their prosensory character.

## **Wnt activity is maximal in dorsal and non-sensory territories of the developing inner ear**

To gain further insights into the temporal and spatial relationship between canonical Wnt activity and prosensory specification, we electroporated the otic placode of E2 (stage HH10) embryos with the Wnt reporter 5TCF::H2B-RFP and collected the samples at 6h (stage HH11), 12h (HH12), 24h (HH18) and 3 days (E5, HH26-27) post-electroporation. At HH11, Sox2 staining was detected throughout the otic placode but decreased in intensity towards its dorso-anterior side; a few cells with low Sox2 expression were also positive for the Wnt reporter in the dorsal rim of the otic placode (**arrowheads in Fig. 5a-a'''**). At HH12, Sox2 staining was confined to the ventral half of the otic cup, with the strongest expression in the anterior prosensory domain (**star in Fig. 5b**). The Wnt reporter was detected in the dorsal side in a complementary manner to Sox2 expression (**arrows in b'**) and it overlapped with Sox2 at the dorsal limit of the prosensory domain (**arrowheads in Fig. 5b-b'''**). As previously described, Wnt reporter activity was detected in the dorsal half of the HH18 (E3) otocyst, whilst Sox2 was confined to its ventral half; only a few cells at the dorsal edge of the prosensory domain were positive for the Wnt reporter and Sox2 (**arrowheads in Fig. 5c'-c'''**).

In order to study the pattern of Wnt activity at later stages of inner ear development, we generated a Tol2-Wnt reporter (T2-5TCF::nd2Scarlet) containing the same regulatory elements and controlling the expression of a nuclear and destabilized form of the Scarlet red fluorescent protein<sup>29</sup>. At E5, the Tol2-Wnt reporter fluorescence remained elevated in the dorsal aspect of the inner ear containing the vestibular organs, the semi-circular canals and the endolymphatic duct (**Fig. 5d-d''**). Reporter activity was highest in the non-sensory tissues surrounding the sensory organs, which at this stage have partially segregated from one another (**Fig. 5e-e''**). There were however a few Sox2-positive cells with comparatively low levels of reporter activity within the cristae and utricle (arrow in **Fig. 5e'**). In the ventral aspect of the inner ear, the cochlear duct was largely devoid of Wnt reporter activity with the exception of the distal tip of the basilar papilla, which consistently contained Sox2-expressing cells with relatively low levels of Wnt reporter fluorescence (**Fig. 5f-f''**).

In summary, these results show that the gradient of Wnt activity observed at the otocyst stage is established progressively in a dorso-ventral manner from the otic placode stage and maintained at later stages of inner ear development. Remarkably, the dorsal suppression of Sox2 expression in the otic cup coincides with the upregulation of Wnt activity, which fits with the idea that high levels of Wnt signalling antagonize prosensory character.

### **Wnt activity regulates the positioning of neurosensory-competent domains**

We next explored the effects of known modulators of Wnt activity on the spatial pattern of Sox2 and Jag1 expression. We first cultured E3 chicken otocysts in control medium or medium supplemented with lithium chloride (LiCl), which promotes canonical Wnt signalling by repressing GSK3 $\beta$  activity<sup>30</sup>. 24-hour LiCl treatments (5 $\mu$ M-35 $\mu$ M) in these organotypic cultures did not abolish Sox2 expression but caused a dose-dependent shift of the position and orientation of the Sox2-positive prosensory domain towards the antero-ventral aspects of the otocyst (n=5-7 per concentration) (**Sup. Fig.4a-e**). This suggests that increasing endogenous Wnt activity might repress prosensory specification in the ventro-posterior otocyst, but that the requirements for low levels of Wnt activity for prosensory specification may be limited to a developmental window before E3-4. We next tested the consequences of reducing Wnt signalling by treating E3 chicken otocysts with IWR-1, a tankyrase inhibitor that stabilizes the axin2 degradation complex and reduces canonical Wnt activity<sup>31</sup>. After 24h culture in medium supplemented with either IWR-1 (300 $\mu$ M) or DMSO (as a control), the otocysts (n=4 for each condition) were immunostained for Sox2 and Jag1. In controls, strong staining for both markers was detected in the anterior domain and weaker expression was present towards the posterior prosensory domain (**Fig. 6a**). In contrast, in samples treated with IWR1, Sox2 and Jag1 expression was markedly expanded in the dorsal half of the otocysts (**Fig. 6a**) and somewhat reduced



in a vertical ventral domain located in the middle of the otocyst. Altogether, these results confirmed that Wnt activity represses prosensory specification and supported the hypothesis that the spatial pattern and levels of Wnt activity regulate the positioning of the prosensory territories of the inner ear.

To identify the molecular targets and pathways potentially regulated by Wnt signalling, we next used RNA-Seq to compare the gene expression profiles of control and IWR-1 treated otocysts. We isolated mRNA from pairs of otocysts dissected from the same embryo but incubated in either IWR-1 or control (DMSO) medium for 24h hours. The experiments were repeated on three embryos and the sequencing results were analysed using the Kallisto and Sleuth packages (**Fig. 6b**), using comparisons between otocysts of the same embryo to minimize inter-individual variability. An unsupervised principal component analysis (PCA) revealed that samples treated with IWR-1 clustered together and were separated from control samples along PC1 (**Fig. 6c**). A total of 1340 genes were differentially expressed ( $p$ -value $<0.05$ ): 733 genes were up-regulated and 607 were down-regulated (**Fig. 6d**, the top 100 up- and down-regulated genes are listed in **sup. tables 1-2**) in IWR-1 treated samples. A bioinformatics analysis using TopGene (default settings) showed that the top 5 biological processes identified by the Gene Ontology (GO) Term analysis were: “epithelium development”, “neurogenesis”, “generation of neurons”, “central nervous system development”, and “neuron differentiation” (**Fig. 6e**). The signalling pathway analysis revealed significant enrichment of genes from the helix-loop-helix (HLH) and Sex-determining region Y (SRY) boxes (or Sox) families (**Fig. 6f**). These included basic HLH transcription factors such as Neurod1, Neurod4 and Hes5.1, Hes5.2, Hes5.3, which are respectively proneural transcription factors and canonical effectors of the Notch pathway. The Notch ligand Dll1 and Notch1 were significantly ( $p<0.001$ ) upregulated in IWR-1 treated samples, whilst Jag1 and Sox2 expression were also upregulated but not in a statistically significant manner ( $p<0.1$  and  $p<0.3$ , respectively). These results prompted us to investigate further the effects of Wnt signalling on otic neurogenesis. Otic cups were electroporated with either control or  $\beta$ cat-LOF constructs, collected at E4, then immunostained for Islet1, a LIM homeobox transcription factor expressed by otic neuroblasts. In all otocysts, Islet1 was strongly expressed in the neuroblasts delaminating from the anterior neurogenic patch (**Fig. 7a-b'**). However, in otocysts electroporated with the  $\beta$ cat-LOF construct, we noticed that some transfected cells were clustered outside of the epithelial lining of the dorsal and posterior otocyst ( $n=3/4$ ) (**Fig. 7a-a'**). These cells expressed Islet1 (**Fig. 7b-c'**), which strongly suggests that they are ectopic delaminating otic neuroblasts. This result, together with our bioinformatic analyses, indicate that Wnt signalling is a negative regulator of both prosensory and neuronal specification in the otocyst.



# **Discussion:**

The axial patterning of the otocyst is regulated by the interactions between cell-intrinsic “fate determinants” and the signalling pathways directing their expression to specific otic territories<sup>32</sup>. In this context, Wnt signalling has been proposed to act as an essential dorsalizing factor. In fact, the dorsal hindbrain produces Wnt1 and Wnt3a, which are thought to trigger high Wnt activity and the expression of vestibular-specific genes in the dorsal otocyst<sup>21, 22, 33</sup>. In compound *Wnt1/Wnt3a* null mice or *β-catenin* null mice, the entire vestibular system fails to form and a poorly developed cochlear-like canal is the only remaining inner ear structure<sup>21</sup>. However, the specific roles of Wnt signalling in the formation of inner ear sensory organs remain unclear. In this study, we took advantage of the amenability of the chicken embryo to mosaic manipulation of gene expression to uncover new roles for Wnt signalling in prosensory and neuronal specification in the inner ear.

## **A dorso-ventral wave and gradient of canonical Wnt activity regulates the spatial pattern of otic neurosensory competence**

Previous studies in transgenic mice harbouring TCF/Lef reporters<sup>21, 22</sup> have shown that canonical Wnt is active in the dorsal otocyst. Our results with a fluorescent TCF/Lef reporter confirm these findings but also show a dorsal-to-ventral (and to some extent posterior-to-anterior) linear reduction in the fluorescence levels of individual cells in the chicken otocyst. This gradient could reflect differences in both dosage of, and total exposure time to, Wnt activity. In fact, dorsal cells are the closest to the hindbrain, which is the proposed source of Wnt ligands influencing otic patterning, but they are also the first to experience Wnt activity during inner ear development. Our data show that this Wnt gradient regulates the expression of Sox2, an essential factor for prosensory specification.

Recent studies<sup>4, 34, 35</sup> have uncovered dynamic changes in Sox2 expression pattern in the early otic vesicle, which were also apparent in our experiments: as the otic placode transforms into a vesicle, Sox2 is confined to the ventral half of the otocyst. Strikingly, the ventral expansion of the Wnt-active domain coincided in space and time with the dorsal down-regulation of Sox2. Our GOF and LOF studies strongly suggest that canonical Wnt drives this ventral restriction in a cell-autonomous manner. In fact, overexpressing βcat-GOF inhibits Sox2 expression and prosensory patch formation ventrally. Conversely, the blockade of canonical Wnt resulting from the overexpression of βcat-LOF leads to the formation of ectopic Sox2/Jag1-positive prosensory patches in the dorsal otocyst. At least some of these are neurogenic, as confirmed by the presence of delaminating Islet1-positive neuroblasts. A comparable result was obtained in otocysts treated *in vitro* with the GSK3β inhibitor IWR-1, which exhibited a dorsal upregulation of Sox2/Jag1 expression. However, in the ventral

otocyst,  $\beta$ cat-LOF transfected cells had much reduced levels of Jag1 and Sox2, suggesting a loss of prosensory character. Altogether, these results imply that high levels of Wnt activity repress Sox2 and neurosensory specification, but transient or low levels of Wnt activity are required for this process to occur. We propose that these dose-dependent effects, elicited by the dorso-ventral wave and gradient of Wnt activity, confine neurosensory-competent domains to the ventral aspect of the otocyst (**Fig. 8**).

Previous studies investigating the roles of Wnt signalling in the early developing inner ear have focused on its requirement for the morphogenesis of the non-sensory structures of the vestibular system. However, one study using tamoxifen-inducible deletion of  $\beta$ -catenin in the mouse embryo reported some defects supporting our conclusions: suppressing  $\beta$ -catenin expression at E10.5 led to a reduction in hair cell formation within some vestibular organs at E14.5, consistent with a requirement for prosensory specification<sup>36</sup>. A major difference with our results is that ectopic sensory patches did not form dorsally in the mouse otocyst. This is most likely explained by the fact the  $\beta$ -catenin cKO allele is a complete null, whilst the overexpression of truncated  $\beta$ -catenin could lead to a partial LOF. In the dorsal otocyst, where endogenous Wnt activity is the strongest,  $\beta$ cat-LOF could reduce Wnt activity to a level that becomes permissive for the maintenance of Sox2 expression.

Strikingly, Rakiowecki and Epstein<sup>36</sup> also found that overexpressing an active form of  $\beta$ -catenin (lacking exon 3) in the embryonic mouse inner ear induces a loss of prosensory markers and hair cells in the anterior and posterior cristae. This result was at the time surprising, since an earlier study by Stevens et al. suggested that forcing Wnt activation in the chicken inner ear elicits the formation of ectopic sensory territories<sup>37</sup>. The N and C-terminal truncated form of  $\beta$ -catenin (containing the Armadillo repeats only, or  $\beta$ cat-LOF in our experiments) used by Stevens et al.<sup>37</sup> was thought to be a GOF protein, since it can induce axis duplication as efficiently as the full-length  $\beta$ -catenin protein in *Xenopus* embryos<sup>38</sup>. However, we found that  $\beta$ cat-LOF represses the activity of the Wnt reporter in the otocyst, confirming that the C-terminal domain of  $\beta$ -catenin is required for its transcriptional activity<sup>39</sup>. Therefore, some of the effects reported in Stevens et al. (ectopic and fused vestibular sensory organs) after truncated  $\beta$ -catenin overexpression can be reconciled with our results and those of Rakowiecki and Epstein<sup>36</sup> if one considers that these were elicited by a reduction, and not a gain, of Wnt activity. One remaining puzzle is that ectopic vestibular-like sensory patches were present in the basilar papilla after infection with RCAS- $\beta$ cat-LOF<sup>37</sup>, whilst we found that Tol2-mediated  $\beta$ cat-LOF overexpression completely abolishes sensory cell formation, including in the auditory organ. This discrepancy may be due to differences in the onset or levels of  $\beta$ cat-LOF

expression after RCAS infection versus Tol2 electroporation, although further studies with inducible LOF and GOF forms of  $\beta$ -catenin will be necessary to confirm this and to define precisely the time window during which Wnt signalling regulates the specification of distinct sensory organs.

#### **Canonical Wnt acts upstream of Notch signalling during neurosensory specification**

Functional interactions between Notch and Wnt signalling have been well documented during hair cell formation and otic placode formation (reviewed in <sup>40</sup>) but not during prosensory specification. Notch signalling functions in two different ways in the early otocyst (reviewed in <sup>19</sup>): it regulates neuroblast formation by lateral inhibition (mediated by the ligand Dll1) and it promotes prosensory specification by lateral induction (Jag1). In this study,  $\beta$ cat-LOF induced Jag1 expression and activation of a Hes5/Notch reporter throughout the otocyst, whilst the  $\beta$ cat-GOF had an opposite effect. Furthermore, several Notch pathway components and neurogenic factors are upregulated in IWR-1 treated otocysts, consistent with an inhibitory effect of Wnt on Notch activity. On the other hand, forcing Notch activity by overexpressing NICD1 had no effect on the pattern of activation of the Wnt reporter in the otocyst. Nevertheless, the ability of  $\beta$ cat-LOF to induce ectopic sensory territories requires Notch activity, as demonstrated by their absence after co-electroporation of  $\beta$ cat-LOF with DN-MAML1. Altogether, these results suggest that Sox2 expression is maintained by a positive feedback loop dependent on Jag1/Notch signalling (lateral induction) and repressed by a dose-dependent negative feedback from Wnt signalling (**Fig.8b**). The interplay of long-range inhibitory (Wnt in this case) and short-range activating (such as Notch) signalling has been well-studied in theoretical models of tissue patterning <sup>41</sup>. If a short-range activator can feedback positively on its long-range inhibitor, a periodic pattern of domains of two different types, forming for example stripes, can spontaneously emerge. In the otic vesicle, Notch activity does not feedback on Wnt signalling, which could explain the initial pattern of neurosensory competence: a broad domain of Sox2-positive cells located at some distance from the long-range inhibitory signal. However, it is possible that Wnt and Notch signalling cross-interact at subsequent developmental stages, and such interactions may contribute to the segregation of the original 'pan-sensory' domain into multiple sensory organs. Further insights into these interactions and the dynamics of production, diffusion and degradation of Wnt ligands will be needed to elucidate their exact morphogenetic roles throughout otic development.

#### **Context and dose-dependent effects of canonical Wnt signalling in the developing inner ear**

Our findings provide further evidence for the great variety of context-dependent functions of Wnt signalling during inner ear development. At early stages of inner ear development, Wnt signalling

regulates otic induction<sup>42</sup>, promotes otic versus epidermal fate in the cranial ectoderm<sup>43, 44</sup> and negatively impacts on otic neurogenesis<sup>45</sup>. We have shown here that besides its requirement for vestibular morphogenesis<sup>21, 22, 36</sup>, canonical Wnt regulates the spatial pattern of neurosensory competence. At later stages, Wnt activity becomes elevated in prosensory domains and has been implicated in the control of progenitor cell proliferation<sup>46, 47</sup> and the patterning of auditory epithelia<sup>48, 49</sup>. These context-specific roles could be explained by distinct co-factors or epigenetic changes that could modify the identity of Wnt target genes in different cell types, and at different developmental stages. Another important factor, highlighted by our findings, is the dosage of Wnt activity: otic progenitors must be exposed to intermediate levels of Wnt activity to maintain a neurosensory competent fate. These insights are directly relevant to the design of improved protocols for the derivation of inner ear organoids from embryonic stem cells. In fact, our results could explain the effects of the Wnt agonist CHIR99021 (CHIR) on 3D stem-cell derived inner ear organoids: intermediate doses of CHIR promote sensory cell formation, but high doses reduce it<sup>50</sup>. In their study, the authors used CHIR at a relatively early stage of organoid formation and concluded that the improvement with intermediate doses of CHIR was due to the ability of Wnt activity to promote otic induction<sup>50</sup>. Our results do not refute this possibility, but they indicate that the time and dose-dependent effects of Wnt activity on prosensory cell specification must also be considered to improve current protocols for in vitro derivation of inner ear sensory cells.

The major challenge ahead is to understand how the large repertoire of Wnt ligands, Frizzled receptors, and modulators of the Wnt pathway expressed in a dynamic manner in the embryonic inner ear<sup>22, 51, 52</sup> regulate both the levels and spatial patterns of Wnt activity. In addition, a membrane-tethered form of Wingless can still elicit a gradient of Wnt activity in the drosophila wing disc, due to the overall growth of the epithelium itself<sup>53</sup>. It is therefore conceivable that the growth and complex 3D remodelling of the inner ear could shape the patterns of Wnt activity during its development. Our findings provide a new framework to explore these questions and the roles of Wnt ligands as tissue morphogens in the inner ear as well as in organoid systems.

## **Material and Methods**

### **Animals**

Fertilised White Leghorn chicken (*Gallus gallus*) eggs were obtained from Henry Stewart UK and incubated at 37.8°C for the designated times. Embryonic stages refer to embryonic days (E), with E1

corresponding to 24 hours of incubation or to Hamburger and Hamilton stages<sup>54</sup>. Embryos older than E5 were sacrificed by decapitation. All procedures were approved by University College London local Ethics Committee.

### **In ovo electroporation**

Electroporation (EP) of the otic placode/cup of E2 chick embryos (stage HH 10–14) was performed using a BTX ECM 830 Electro Square Porator as previously described<sup>55</sup>. The total concentration of plasmid DNA ranged for each set of experiments between 0.5–1µg/µl. Unless otherwise specified, a minimum number of 6 successfully transfected samples were examined for each experimental condition.

### **Plasmids**

The plasmids used in this study and their origin are described in the **Supplementary Material and Methods** file. New constructs were generated by standard subcloning methods or using the In-Fusion HD Cloning Kit (TakaraBio). All plasmids used for in ovo electroporation were purified using the Qiagen Plasmid Plus Midi Kit (Qiagen).

### **Wnt gradient Quantification**

Chicken embryos were electroporated at E2 with 5TCF::H2B-RFP (Wnt reporter) and T2-EGFP (control) plasmids. Otocysts were collected 24h post-electroporation and confocal stacks (16-bit pixel intensity scale) were taken from whole mount preparations. Seven almost fully transfected otocysts (based on EGFP expression) were selected for further analyses using the Volocity software. The EGFP channel was used to outline the otocyst region of interest (ROI). Next, the commands ‘Finding Object’ and ‘Filter Population’ (same settings for each otocyst) were applied to the RFP channel to detect cell nuclei positive for Wnt reporter within the ROI. The ‘Separate Touching Objects’ function was used to segment individual cell nuclei. Mean RFP fluorescence intensity values and X,Y coordinates of individual nuclei were exported to Excel, normalised by Min-Max scaling for each individual otocyst and plotted using ggplot2 in Rstudio. To analyse the profile of the Wnt gradient, the median and standard deviation of RFP intensity of groups of nuclei was calculated in 10% increment steps along the dorso-ventral (Y) axis of the otocyst and plotted using ggplot2 (see also **Supplementary Material and Methods**).

### **Immunohistochemistry**

Entire chicken embryos (E3-E4) or their heads (>E5) were collected, fixed for 1.5-2h in 4% paraformaldehyde (PFA) in 0.1 M phosphate buffered saline (PBS), and processed for whole-mount

immunostaining using conventional methods. Further details of the protocol and reagents can be found in the **Supplementary Material and Methods** file. The following antibodies were used: rabbit anti-Jagged 1 (Santa-Cruz Biotechnology, Dallas, TX; sc-8303; 1:200), rabbit anti-Sox2 (Abcam, UK; 97959, 1:500), mouse IgG1 monoclonal anti-Sox2 (BD Biosciences, San Jose, CA; 561469, 1:500), mouse IgG1 anti-Islet1 (Developmental Studies Hybridoma Bank, Iowa City, IA; Clone 39.3F7, 1:250), mouse IgG1 anti-HA-tag (BabcoInc., Richmond, CA; MMS-101R, 1:500), mouse IgG1 anti-Myo7a (Developmental Studies Hybridoma Bank, 1:500), mouse IgG1 anti-HCA (a kind gift of Guy Richardson, 1:1000). Secondary goat antibodies conjugated to Alexa dyes (1:1000) were obtained from Thermo Fischer Scientific (UK). Confocal stacks were acquired using a Zeiss LSM880 inverted confocal microscope and further processed with ImageJ.

## **Organotypic cultures**

Dissections were performed in ice-cold L-15 medium (Leibovitz). E3 embryos were halved along the midline, the head and trunk were removed; the otocysts with surrounding region including the hindbrain were placed in 35mm Mattek dishes coated with a thick layer of ice-cold Matrigel (Corning). Next, samples were incubated in a culture incubator (5% CO<sub>2</sub>, 37°C) for 30 minutes to allow polymerisation of Matrigel. Samples were then incubated for 24h in approximately 250-300 µl of DMEM/F12 medium with Phenol Red (Invitrogen) containing 1% HEPES, 0.1% CIPRO and supplemented with LiCl, IWR-1, or vehicle at matched concentration in control experiments. On the next day, samples were washed in ice-cold PBS, fixed for 1.5h in PBS containing 4% PFA, and processed for immunohistochemistry. Otocysts electroporated with 5TCF::H2B-RFP were cultured for 24h in medium supplemented with LiCl and IWR-1 to assess their effects on Wnt activity (**Sup. Fig. 1**). The working concentration of IWR-1 (300µM) was determined by qPCR (see **Supplementary Material and Methods** file).

## **RNA-Sequencing and bioinformatics analysis**

Both left and right ears were dissected from chicken embryos aged E2.5, cleaned from surrounding mesenchyme and individually incubated as free-floating cultures in control (DMSO, left otocyst) or IWR1-supplemented (300µM, right otocyst) media for 24h. Details of the methods used for RNA-Seq and bioinformatics analyses are given in the **Supplementary Material and Methods**. The GEO accession number for the dataset is GSE149310.

## Figure legends

**Figure 1.** Spatial pattern of Wnt activity in the E3 chicken otocyst. In all panels, dorsal (D) is up and anterior (A) is right. **a)** E2 chicken embryos were co-electroporated either with Wnt reporter and a control plasmid T2-EGFP or Wnt reporter together with a Notch reporter and collected at E3. The Wnt reporter (5TCF::H2B-RFP) contains 5 TCF/LEF binding sites regulating an H2B-RFP fusion protein. In the Notch reporter (T2-Hes5::nd2EGFP), the mouse Hes5 promoter regulates expression of a nuclear destabilised EGFP. The control vector drives constitutive expression of EGFP. **b-b')** Whole-mount view of an E3 otocyst electroporated with the Wnt reporter and a control plasmid. Wnt-responsive cells (**b')** are detected in the dorsal 2/3 of the otocyst. **c)** Quantification of Wnt reporter fluorescent levels in individual cells from 7 otocysts transfected with the Wnt reporter (see methods). A decreasing gradient of Wnt reporter fluorescence is observed along the dorso-ventral and postero-anterior axis of the otocyst. **d)** Plot of the normalized median fluorescence levels of cells as a function of their position along the dorso-ventral axis of the otocyst. The standard deviation bars reflect variability in fluorescent intensity along the antero-posterior axis. **e)** E3 chicken otocyst co-electroporated with the Wnt and Notch reporters. The Notch reporter marks the prosensory cells in the antero-ventral prosensory domain. **f'-f'')** Higher magnification views of the anterior prosensory domain, showing a partial overlap in the activity of the two reporters. Note that the cells with high Notch activity (arrowheads) tend to have low levels of Wnt activity.

**Figure 2.** Wnt signalling antagonizes Notch activity. **a-d')** Schematic representation of the Piggybac, Tol2 and RCAS constructs used for  $\beta$ -catenin gain (GOF) and loss-of-function (LOF) experiments. The PB- $\beta$ cat-GOF and T2- $\beta$ cat-GOF contain the full-length  $\beta$ -catenin including the  $\alpha$ -catenin binding domain ( $\alpha$ Cat-BD), 12 Armadillo domains, the transactivator (TS) motif and the S33Y mutation preventing phosphorylation and degradation. The RCAS- $\beta$ cat-LOF and T2- $\beta$ cat-LOF constructs drive expression of a truncated form of  $\beta$ -catenin comprising the Armadillo repeats only. **b-d')** Activity of the Wnt reporter in E3 otocysts co-electroporated with either T2-EGFP (control; **b-b')**, PB- $\beta$ cat-GOF (**c-c')**, or RCAS- $\beta$ cat-LOF (**d-d')**. Note the ventral expansion of the Wnt reporter fluorescence in (**c-c')** and almost complete loss of reporter activity in (**d-d')**. **e-g')** Activity of the Notch reporters T2-Hes5::nd2EGFP or Hes5::d2FP635 in E3 otocysts co-electroporated with either T2-mCherry (control, **e-e')**, T2- $\beta$ cat-LOF (**f-f')**, or PB- $\beta$ cat-GOF (**g-g')**. The Notch reporter is normally activated in the anterior (arrowhead) and to a lesser extent posterior (asterisk) prosensory domains of the otocyst (**e-**



**e'**). It is strongly upregulated in dorsal regions transfected with the T2- $\beta$ cat-LOF construct (brackets in **f-f'**), but barely detectable in otocysts co-electroporated with PB- $\beta$ cat-GOF (**g-g'**).

**Figure 3.** Wnt signalling antagonizes prosensory specification. Whole-mount views of E4 chicken otocysts electroporated at E2 and immunostained for Jag1 and Sox2 expression. **a-a''**) control sample electroporated with T2-mCherry. Jag1 and Sox2 are expressed in a U-shaped ventral common prosensory-competent domain (psd) and prospective prosensory domains (pc = posterior crista; ac=anterior crista). **b-c''**)  $\beta$ cat-GOF overexpression induces a mosaic down-regulation of Sox2 and Jag1 expression (arrowheads) in the ventral half of the otocyst. High magnification views of transfected cells (arrowheads in **c-c''**) show that this effect is cell-autonomous. **d-g''**) Otocysts transfected with T2- $\beta$ cat-LOF exhibit a dorsal expansion of Jag1 and Sox2 expression (star in **d'-d''**) and ectopic prosensory patches dorsally (arrowheads in **d'-d''**, **f'** and high magnification views in **e-e''**). Note that some ectopic Sox2-positive patches are Jag1-negative (arrows in **e'-e''**). In contrast, in the ventral-most aspect of the otocyst,  $\beta$ cat-LOF overexpressing cells exhibit reduced Sox2 expression (arrowheads in high magnification views **g-g''**).

**Figure 4.** Manipulating Wnt activity alters inner ear sensory organ formation. **a-a''**) Whole-mount (tilled maximum projection) views of an E7 chicken inner ear electroporated at E2 with a control vector (T2-mEGFP) and immunostained for Sox2 (**a'**) and two hair cell markers, Myo7a and HCA ("HC" in all panels) (**a''**). All sensory organs are properly formed: posterior (pc), anterior (ac) and lateral (lc) cristae, saccule (sc), utricle (ut), basilar papilla (bp), and lagena (l). **b-c''**) An inner ear transfected with T2- $\beta$ cat-GOF. Note the absence of EGFP expression and severe defects in overall morphology of the vestibular system and basilar papilla; the remaining sensory patches are small and abnormally shaped (**b'**). **c-c''**) Higher magnification of the vestibular Sox2-positive patches containing Myo7a and HCA-expressing hair cells. **d-f''**) An inner ear transfected with T2- $\beta$ cat-LOF. **d-d''**) Whole-mount (tilled maximum projection) views demonstrating the presence of numerous ectopic sensory patches with hair cells, and severe defects in inner ear morphology **e-e''**) Higher magnification of the dorsal region, where transfected cells form ectopic sensory patches positive for Sox2 (**e'**) and populated with Myo7a and HCA-expressing hair cells (arrowheads). **f-f''**) In contrast, in ventral domains, EGFP-positive patches are devoid of Sox2 and hair cell markers expression. The only remaining Sox2-expressing patches are not transfected (arrows).

**Figure 5.** Spatial pattern of Wnt activity in the developing chicken inner ear. Samples co-electroporated at the early otic placode stage with a Wnt reporter (5TCF::H2B-RFP or T2-5TCF::nd2Scarlet for long-term integration) and a control plasmid (T2-mEGFP in **a-d**) were collected 6h (stage HH11), 12h (HH12-13), 24h (HH18) and 3 days (E5, HH26-27) post-electroporation and immunostained for Sox2 expression. **a-a''**) Only a few cells on the dorso-medial wall of the otic placode are positive for Wnt reporter 5TCF::H2B-RFP (arrowheads in **a'**), whilst most otic cells express Sox2 (**a''**). **b-c''**) Wnt activity increases gradually in the dorsal aspect of the otic cup and otocyst (stars in **b'** and **c'**), concomitant to a dorsal decrease in Sox2 expression (**b''-c''**). Note the overlap between the signals of Wnt reporter and Sox2 (arrowheads in **b'-b''** and **c'-c''**) at the dorsal edges of the prosensory domains. **d-d''**) The Wnt reporter T2-5TCF::nd2Scarlet is strongly active in the dorsal half of the E5 inner ear (stars in **d'-d''**) and a weaker signal is also detected at the tip of developing basilar papilla (arrowhead). **e-e''**) Higher magnification views of the anterior vestibular organs. Note the high levels of Wnt activity in the non-sensory territories. In comparison, transfected prosensory cells located within the anterior crista (ac) and utricle (ut) have lower levels of fluorescence (arrow in **e'**). **f-f''**) Higher magnification views of the ventral (distal) tip of the basilar papilla, which also contains Wnt-active prosensory cells (arrowheads).

**Figure 6.** Wnt signalling regulates the expression of genes involved in neurosensory specification. **a**) Whole-mounts of E3 otocysts cultured for 24h in IWR-1 to inhibit Wnt signalling or DMSO (vehicle) as a control. Blocking Wnt signalling results in a dorsal expansion of Sox2 and Jag1 staining. **b**) Schematic representation of the RNA-Seq screening for Wnt target genes. **c**) Principal Component Analysis (PCA) of three biological replicates using all differentially expressed genes (n = 17682 genes). **d**) Volcano plot representing the changes in expression level of the genes significantly (p-value < 0.05) up-regulated (n=733, in red) or downregulated (n=607, in blue) in IWR-1 treated samples compared to controls. **e**) Top 5 biological functions of differentially expressed genes identified by Gene Ontology analysis. **f**) Known bHLH and SRY-box family genes associated to neurogenesis and either up- or down-regulated after IWR-1 treatment.

**Figure 7.** Blocking Wnt signalling triggers ectopic neurogenesis. **a-a'**) Whole-mount views of an E4 otocyst electroporated at E2 with a control T2-mCherry vector and immunostained for the otic neuronal marker Islet1. The cochleo-vestibular ganglion (star) is on the anterior side of the otocyst. **b-c'**) In the T2- $\beta$ cat-LOF transfected otocyst, ganglion-like clusters of Islet1-expressing cells are present in posterior and dorsal locations (arrowheads). **c-c'**) A higher magnification view of the

posterior region of the otocyst shown in **b**. Note the presence of Islet1-positive cells within the epithelial lining of the otocyst itself (arrow).

**Figure 8.** A schematic model of the effects of canonical Wnt activity on the patterning of inner ear neurosensory-competent domains. **a)** The hindbrain produces Wnt1 and Wnt3a ligands activating Wnt signalling in the dorsal aspect of the otic placode. Over time, a dorso-ventral gradient of Wnt activity forms in the otic cup and otocyst and regulates in a dose-dependent manner neural and prosensory specification. At intermediate levels, Wnt activity is permissive for the maintenance of Sox2 expression and Notch activity. Hence, the dorso-ventral gradient of Wnt activity confines Sox2 expression to a middle region of neurosensory-competence from where the individual sensory organs will originate. **b)** schematic representation of the regulatory interactions between Wnt and Notch signalling and their impact on Sox2 expression.

**Supplementary Figure 1.** Effects of LiCl and IWR1 on Wnt activity. **a-c')** Whole-mount views of otic cups co-electroporated with the Wnt reporter and a control EGFP vector and incubated for 24 hrs in control medium (DMSO) (**a-a'**), or media supplemented with either the Wnt agonist LiCl (**b-b'**) or the antagonist IWR-1 (**c-c'**).

**Supplementary Figure 2.** Manipulating Notch activity does not affect Wnt signalling. **a-c')** Whole-mounts of E3 chicken otocysts co-electroporated with Wnt reporter 5TCF::H2B-RFP and a control plasmid T2-EGFP or constructs activating (pNICD1-EGFP) and blocking (pDN-MAML1-EGFP) Notch signalling. There are no major changes in the dorso-ventral pattern of activation of the Wnt reporter in response to gain- and loss-of-Notch function (**a', b', c'**).

**Supplementary Figure 3.** Effects of simultaneous loss of Wnt and Notch activity on prosensory specification. Whole-mount of an E4 otocyst co-electroporated with T2- $\beta$ cat-LOF and a dominant-negative form of Maml1 (pDN-MAML1-EGFP) and immunostained for Sox2. **a-a'')** Sox2-expressing cells occupy the ventral half of the otocyst. There is no noticeable dorsal expansion of Sox2 expression (compare with **Figure 3**) and only a very limited number of EGFP-positive cells with ectopic Sox2 expression (arrows and high magnification views in **b-b'''**) are present in the dorsal half of the otocyst.

**Supplementary Figure 4.** Effects of the Wnt agonist LiCl on Sox2 expression. **a-e)** Whole-mounts of E3 chicken otocysts incubated for 24h in control medium or media enriched with increasing doses of LiCl. **a)** In control condition, Sox2 marks a medial band of sensory-competent cells stretching along the antero-posterior axis of the otocyst. **b-e)** With increasing doses of LiCl, there is a decrease of Sox2 expression in the posterior side (stars in **c-e**) as well as a noticeable shift of the orientation of the anterior Sox2-positive domain towards the ventral side.

**Supplementary Movie 1.** E3 chicken otocyst electroporated with Wnt reporter 5TCF::H2B-RFP and control plasmid T2-EGFP.

## Acknowledgments

We thank Thea Støle and Caitlin Broadbent (UCL Ear Institute) and Paola Niola and Tony Brooks (UCL Genomics) for excellent technical support. We are grateful to the following researchers for sharing essential plasmids with us: Sebastian Pons (5TCF::H2B-RFP, PB-βcat-GOF, mPB), Donna Fekete (RCAS-βcat-LOF), Christophe Marcelle (pDN-MAML1-EGFP). We thank Guy Richardson for the generous gift of the HCA antibody.

The mouse IgG1 anti-Islet1 antibody (clone 39.3F7) developed by T.M Jessell and S. Brenner-Morton was obtained from the Developmental Studies Hybridoma Bank, created by the NICHD of the NIH and maintained at The University of Iowa, Department of Biology, Iowa City, IA 52242.

This work was supported by an Action on Hearing Loss International Research Grant (G76; MZ) and the Medical Research Council (MR/S003029/1; ND).

We thank Donna Fekete, Andy Forge and Jonathan Gale for their comments on the manuscript.

## References

1. Neves J, Kamaid A, Alsina B, Giraldez F. Differential expression of Sox2 and Sox3 in neuronal and sensory progenitors of the developing inner ear of the chick. *J Comp Neurol* **503**, 487-500 (2007).
2. Kiernan AE, *et al.* Sox2 is required for sensory organ development in the mammalian inner ear. *Nature* **434**, 1031-1035 (2005).
3. Pan W, Jin Y, Chen J, Rottier RJ, Steel KP, Kiernan AE. Ectopic expression of activated notch or SOX2 reveals similar and unique roles in the development of the sensory cell progenitors in the mammalian inner ear. *J Neurosci* **33**, 16146-16157 (2013).
4. Steevens AR, Sookiasian DL, Glatzer JC, Kiernan AE. SOX2 is required for inner ear neurogenesis. *Sci Rep* **7**, 4086 (2017).
5. Mann ZF, *et al.* Shaping of inner ear sensory organs through antagonistic interactions between Notch signalling and Lmx1a. *Elife* **6**, (2017).
6. Morsli H, Choo D, Ryan A, Johnson R, Wu DK. Development of the mouse inner ear and origin of its sensory organs. *J Neurosci* **18**, 3327-3335 (1998).

- 1     7.     Adam J, *et al.* Cell fate choices and the expression of Notch, Delta and Serrate homologues in  
2     the chick inner ear: parallels with *Drosophila* sense-organ development. *Development* **125**,  
3     4645-4654 (1998).
- 4
- 5     8.     Fritzsche B, *et al.* Development and evolution of inner ear sensory epithelia and their  
6     innervation. *J Neurobiol* **53**, 143-156 (2002).
- 7
- 8     9.     Satoh T, Fekete DM. Clonal analysis of the relationships between mechanosensory cells and  
9     the neurons that innervate them in the chicken ear. *Development* **132**, 1687-1697 (2005).
- 10
- 11     10.     Kiernan AE, *et al.* The Notch ligand Jagged1 is required for inner ear sensory development.  
12     *Proc Natl Acad Sci U S A* **98**, 3873-3878 (2001).
- 13
- 14     11.     Kiernan AE, Xu J, Gridley T. The Notch ligand JAG1 is required for sensory progenitor  
15     development in the mammalian inner ear. *PLoS Genet* **2**, e4 (2006).
- 16
- 17     12.     Brooker R, Hozumi K, Lewis J. Notch ligands with contrasting functions: Jagged1 and Delta1 in  
18     the mouse inner ear. *Development* **133**, 1277-1286 (2006).
- 19
- 20     13.     Daudet N, Ariza-McNaughton L, Lewis J. Notch signalling is needed to maintain, but not to  
21     initiate, the formation of prosensory patches in the chick inner ear. *Development* **134**, 2369-  
22     2378 (2007).
- 23
- 24     14.     Pan W, Jin Y, Stanger B, Kiernan AE. Notch signaling is required for the generation of hair cells  
25     and supporting cells in the mammalian inner ear. *Proc Natl Acad Sci U S A* **107**, 15798-15803  
26     (2010).
- 27
- 28     15.     Tsai H, *et al.* The mouse slalom mutant demonstrates a role for Jagged1 in neuroepithelial  
29     patterning in the organ of Corti. *Hum Mol Genet* **10**, 507-512 (2001).
- 30
- 31     16.     Daudet N, Lewis J. Two contrasting roles for Notch activity in chick inner ear development:  
32     specification of prosensory patches and lateral inhibition of hair-cell differentiation.  
33     *Development* **132**, 541-551 (2005).
- 34
- 35     17.     Hartman BH, Reh TA, Bermingham-McDonogh O. Notch signaling specifies prosensory  
36     domains via lateral induction in the developing mammalian inner ear. *Proc Natl Acad Sci U S*  
37     *A* **107**, 15792-15797 (2010).
- 38
- 39     18.     Neves J, Parada C, Chamizo M, Giraldez F. Jagged 1 regulates the restriction of Sox2  
40     expression in the developing chicken inner ear: a mechanism for sensory organ specification.  
41     *Development* **138**, 735-744 (2011).
- 42

19. Daudet N, Zak M. Notch Signalling: The Multitask Manager of Inner Ear Development and Regeneration. *Adv Exp Med Biol* **1218**, 129-157 (2020).
20. Komiya Y, Habas R. Wnt signal transduction pathways. *Organogenesis* **4**, 68-75 (2008).
21. Riccomagno MM, Takada S, Epstein DJ. Wnt-dependent regulation of inner ear morphogenesis is balanced by the opposing and supporting roles of Shh. *Genes Dev* **19**, 1612-1623 (2005).
22. Noda T, Oki S, Kitajima K, Harada T, Komune S, Meno C. Restriction of Wnt signaling in the dorsal otocyst determines semicircular canal formation in the mouse embryo. *Dev Biol* **362**, 83-93 (2012).
23. Pani AM, Goldstein B. Direct visualization of a native Wnt in vivo reveals that a long-range Wnt gradient forms by extracellular dispersal. *Elife* **7**, (2018).
24. Farin HF, *et al.* Visualization of a short-range Wnt gradient in the intestinal stem-cell niche. *Nature* **530**, 340-343 (2016).
25. Chrysostomou E, Gale JE, Daudet N. Delta-like 1 and lateral inhibition during hair cell formation in the chicken inner ear: evidence against cis-inhibition. *Development* **139**, 3764-3774 (2012).
26. Maillard I, *et al.* Mastermind critically regulates Notch-mediated lymphoid cell fate decisions. *Blood* **104**, 1696-1702 (2004).
27. Gibson F, *et al.* A type VII myosin encoded by the mouse deafness gene shaker-1. *Nature* **374**, 62-64 (1995).
28. Goodyear RJ, *et al.* A receptor-like inositol lipid phosphatase is required for the maturation of developing cochlear hair bundles. *J Neurosci* **23**, 9208-9219 (2003).
29. Bindels DS, *et al.* mScarlet: a bright monomeric red fluorescent protein for cellular imaging. *Nat Methods* **14**, 53-56 (2017).
30. Klein PS, Melton DA. A molecular mechanism for the effect of lithium on development. *Proc Natl Acad Sci U S A* **93**, 8455-8459 (1996).
31. Chen B, *et al.* Small molecule-mediated disruption of Wnt-dependent signaling in tissue regeneration and cancer. *Nat Chem Biol* **5**, 100-107 (2009).



32. Fekete DM, Wu DK. Revisiting cell fate specification in the inner ear. *Curr Opin Neurobiol* **12**, 35-42 (2002).
33. Bok J, Bronner-Fraser M, Wu DK. Role of the hindbrain in dorsoventral but not anteroposterior axial specification of the inner ear. *Development* **132**, 2115-2124 (2005).
34. Steevens AR, Glatzer JC, Kellogg CC, Low WC, Santi PA, Kiernan AE. SOX2 is required for inner ear growth and cochlear nonsensory formation before sensory development. *Development* **146**, (2019).
35. Gu R, *et al.* Lineage tracing of Sox2-expressing progenitor cells in the mouse inner ear reveals a broad contribution to non-sensory tissues and insights into the origin of the organ of Corti. *Dev Biol* **414**, 72-84 (2016).
36. Rakowiecki S, Epstein DJ. Divergent roles for Wnt/beta-catenin signaling in epithelial maintenance and breakdown during semicircular canal formation. *Development* **140**, 1730-1739 (2013).
37. Stevens CB, Davies AL, Battista S, Lewis JH, Fekete DM. Forced activation of Wnt signaling alters morphogenesis and sensory organ identity in the chicken inner ear. *Dev Biol* **261**, 149-164 (2003).
38. Funayama N, Fagotto F, McCrea P, Gumbiner BM. Embryonic axis induction by the armadillo repeat domain of beta-catenin: evidence for intracellular signaling. *J Cell Biol* **128**, 959-968 (1995).
39. Herrera A, Saade M, Menendez A, Marti E, Pons S. Sustained Wnt/beta-catenin signalling causes neuroepithelial aberrations through the accumulation of aPKC at the apical pole. *Nat Commun* **5**, 4168 (2014).
40. Žak M, Klis SF, Grolman W. The Wnt and Notch signalling pathways in the developing cochlea: Formation of hair cells and induction of regenerative potential. *Int J Dev Neurosci* **47**, 247-258 (2015).
41. Gierer A, Meinhardt H. A theory of biological pattern formation. *Kybernetik* **12**, 30-39 (1972).
42. Ladher RK, Anakwe KU, Gurney AL, Schoenwolf GC, Francis-West PH. Identification of synergistic signals initiating inner ear development. *Science* **290**, 1965-1967 (2000).
43. Ohyama T, Mohamed OA, Taketo MM, Dufort D, Groves AK. Wnt signals mediate a fate decision between otic placode and epidermis. *Development* **133**, 865-875 (2006).

44. Freter S, Muta Y, Mak SS, Rinkwitz S, Ladher RK. Progressive restriction of otic fate: the role of FGF and Wnt in resolving inner ear potential. *Development* **135**, 3415-3424 (2008).
45. Freyer L, Morrow BE. Canonical Wnt signaling modulates Tbx1, Eya1, and Six1 expression, restricting neurogenesis in the otic vesicle. *Dev Dyn* **239**, 1708-1722 (2010).
46. Jacques BE, *et al.* A dual function for canonical Wnt/beta-catenin signaling in the developing mammalian cochlea. *Development* **139**, 4395-4404 (2012).
47. Jacques BE, *et al.* The role of Wnt/beta-catenin signaling in proliferation and regeneration of the developing basilar papilla and lateral line. *Dev Neurobiol* **74**, 438-456 (2014).
48. Munnamalai V, Fekete DM. Notch-Wnt-Bmp crosstalk regulates radial patterning in the mouse cochlea in a spatiotemporal manner. *Development* **143**, 4003-4015 (2016).
49. Munnamalai V, *et al.* Wnt9a Can Influence Cell Fates and Neural Connectivity across the Radial Axis of the Developing Cochlea. *J Neurosci* **37**, 8975-8988 (2017).
50. DeJonge RE, Liu XP, Deig CR, Heller S, Koehler KR, Hashino E. Modulation of Wnt Signaling Enhances Inner Ear Organoid Development in 3D Culture. *PLoS One* **11**, e0162508 (2016).
51. Sienknecht UJ, Fekete DM. Mapping of Wnt, frizzled, and Wnt inhibitor gene expression domains in the avian otic primordium. *J Comp Neurol* **517**, 751-764 (2009).
52. Sienknecht UJ, Fekete DM. Comprehensive Wnt-related gene expression during cochlear duct development in chicken. *J Comp Neurol* **510**, 378-395 (2008).
53. Alexandre C, Baena-Lopez A, Vincent JP. Patterning and growth control by membrane-tethered Wingless. *Nature* **505**, 180-185 (2014).
54. Hamburger V, Hamilton HL. A series of normal stages in the development of the chick embryo. 1951. *Dev Dyn* **195**, 231-272 (1992).
55. Freeman S, Chrysostomou E, Kawakami K, Takahashi Y, Daudet N. Tol2-mediated gene transfer and in ovo electroporation of the otic placode: a powerful and versatile approach for investigating embryonic development and regeneration of the chicken inner ear. *Methods Mol Biol* **916**, 127-139 (2012).

Figure 1.

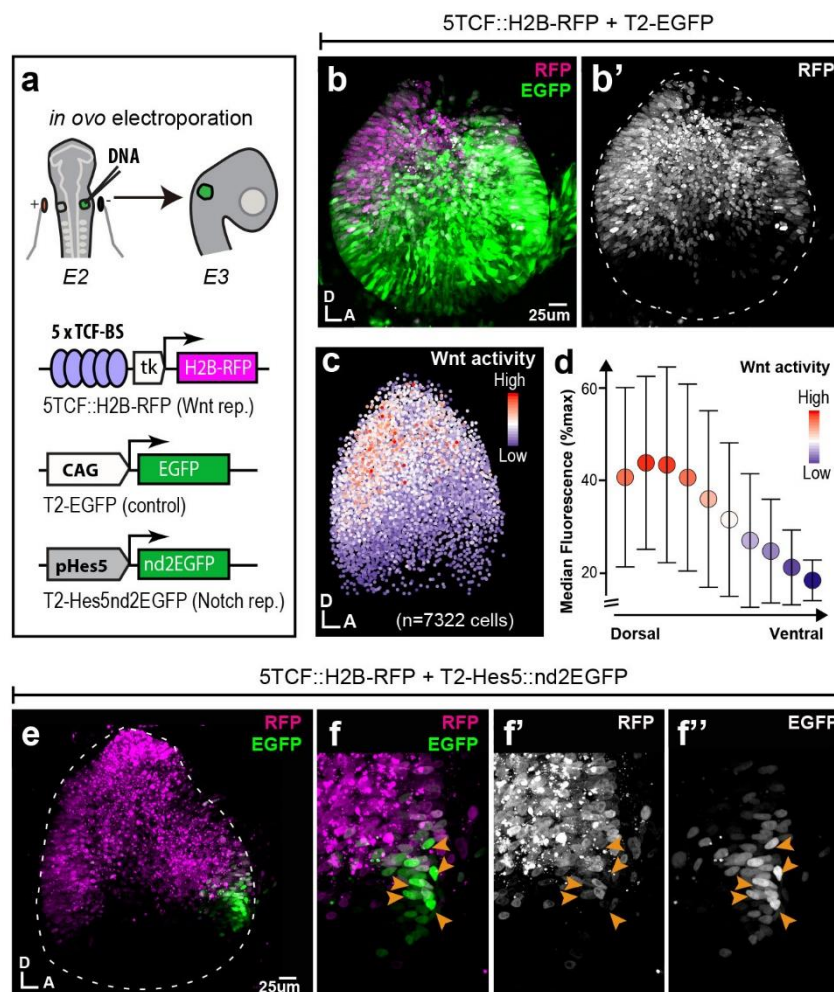

# 1 Figure 2.

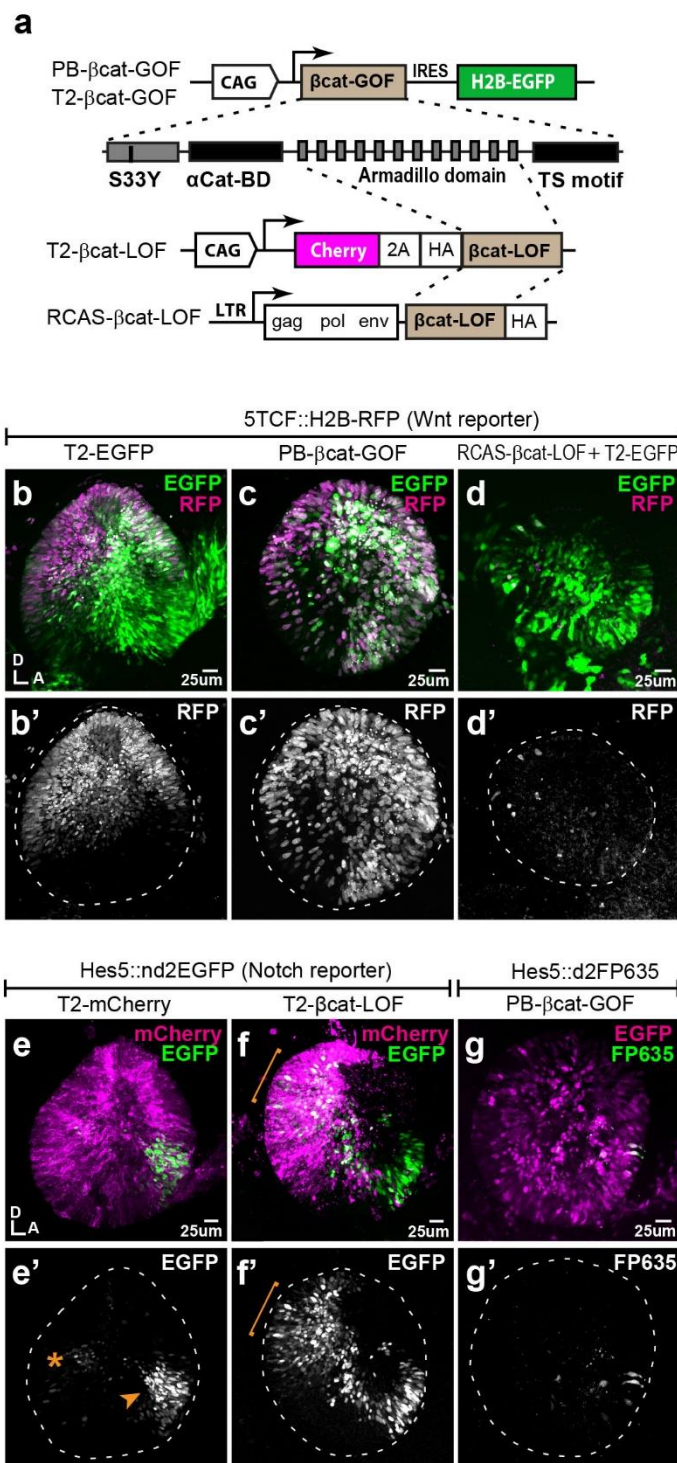



1     Figure 3.

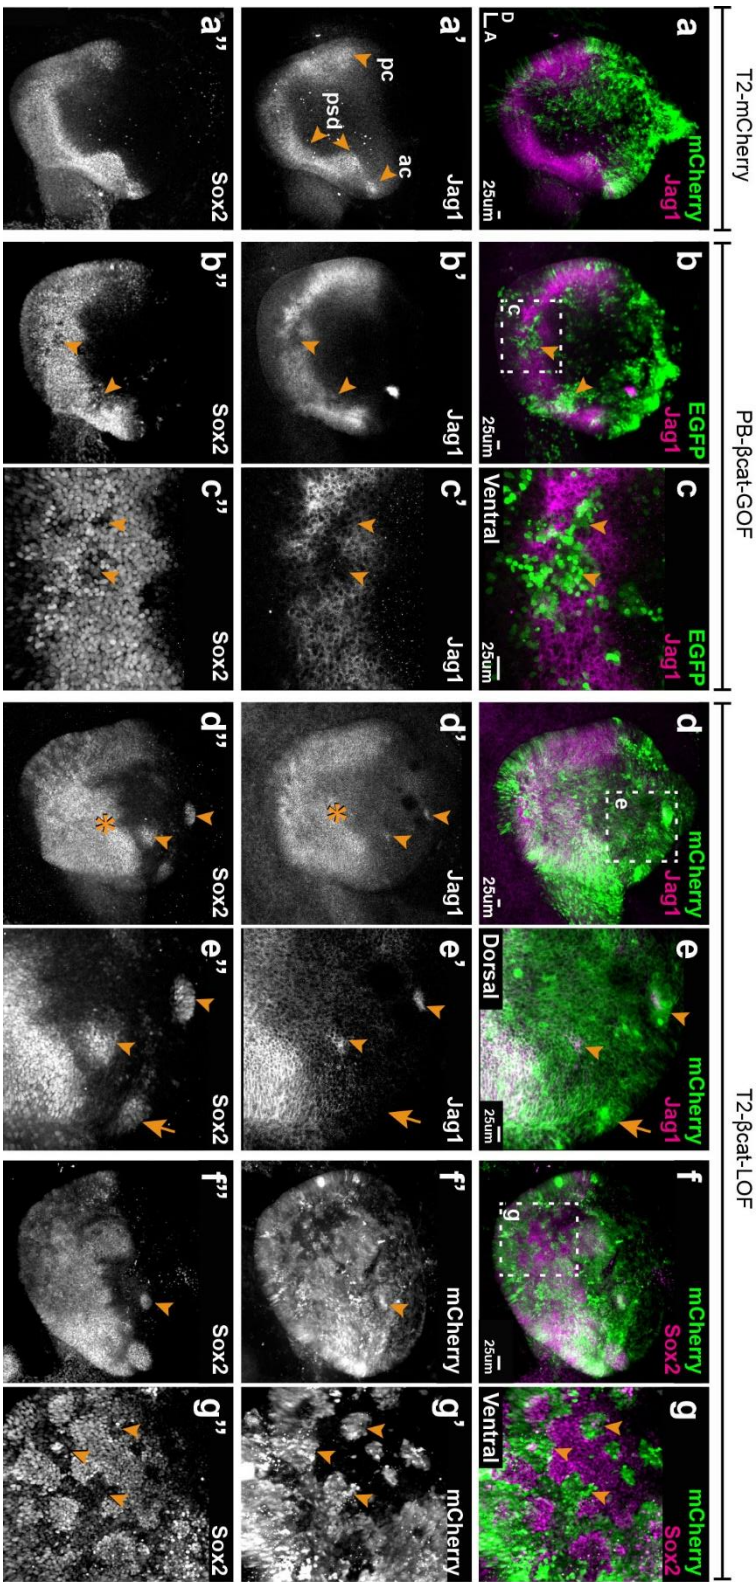

2

3

4

1 Figure 4.

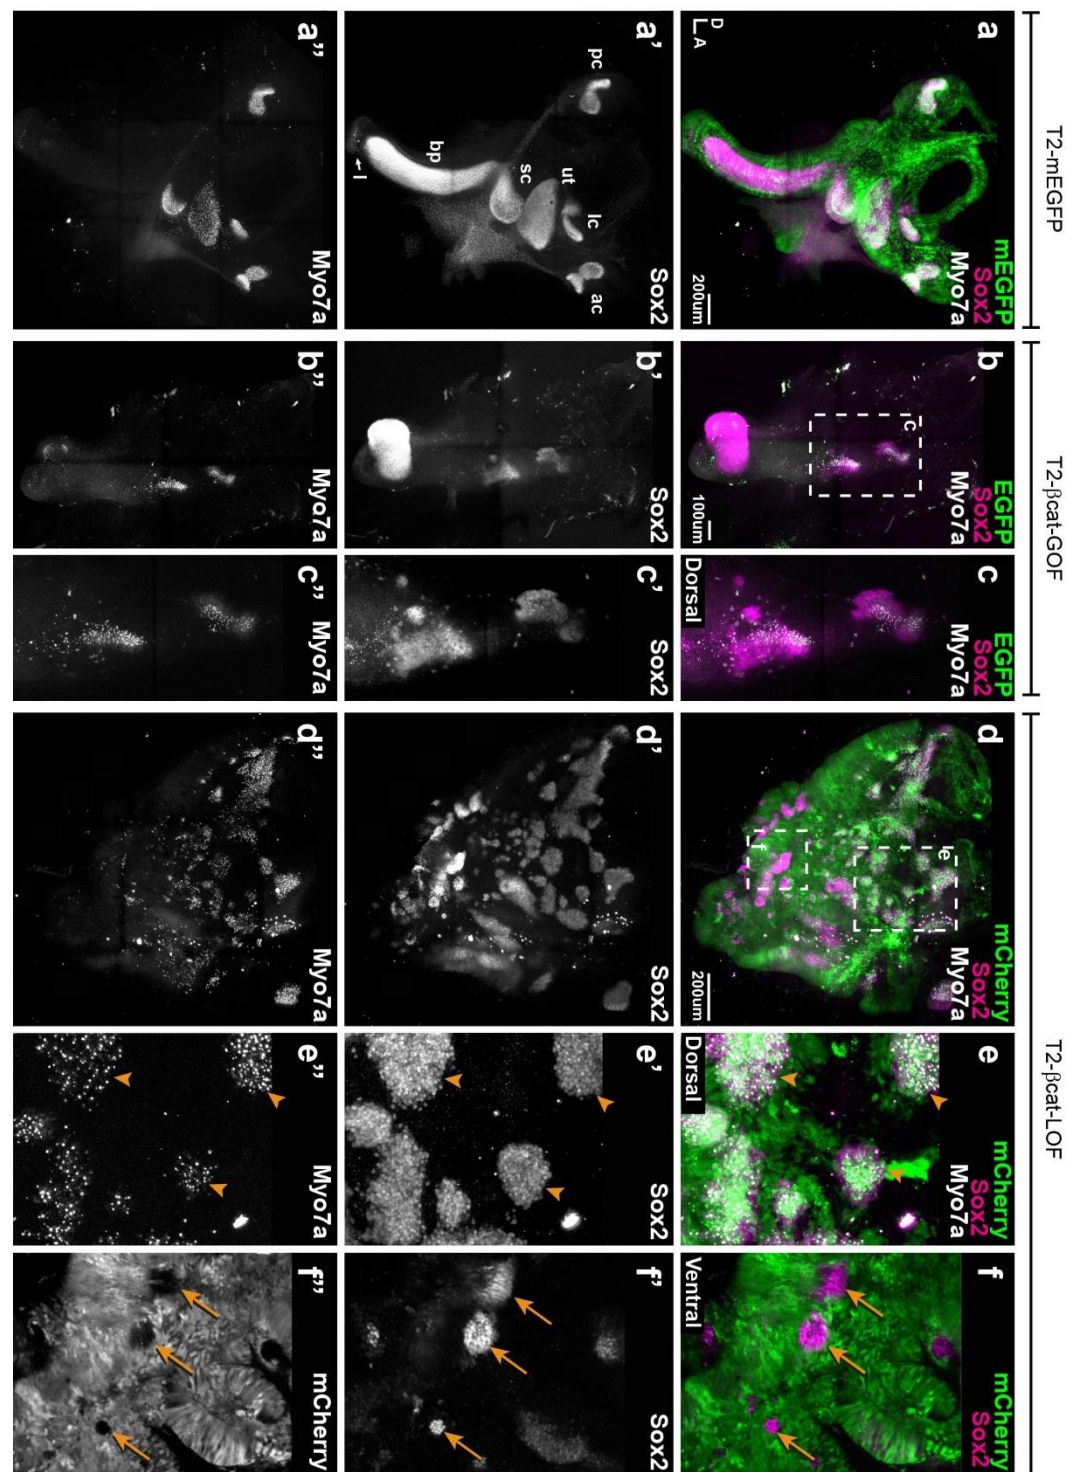

2

3

4

5



Figure 5.

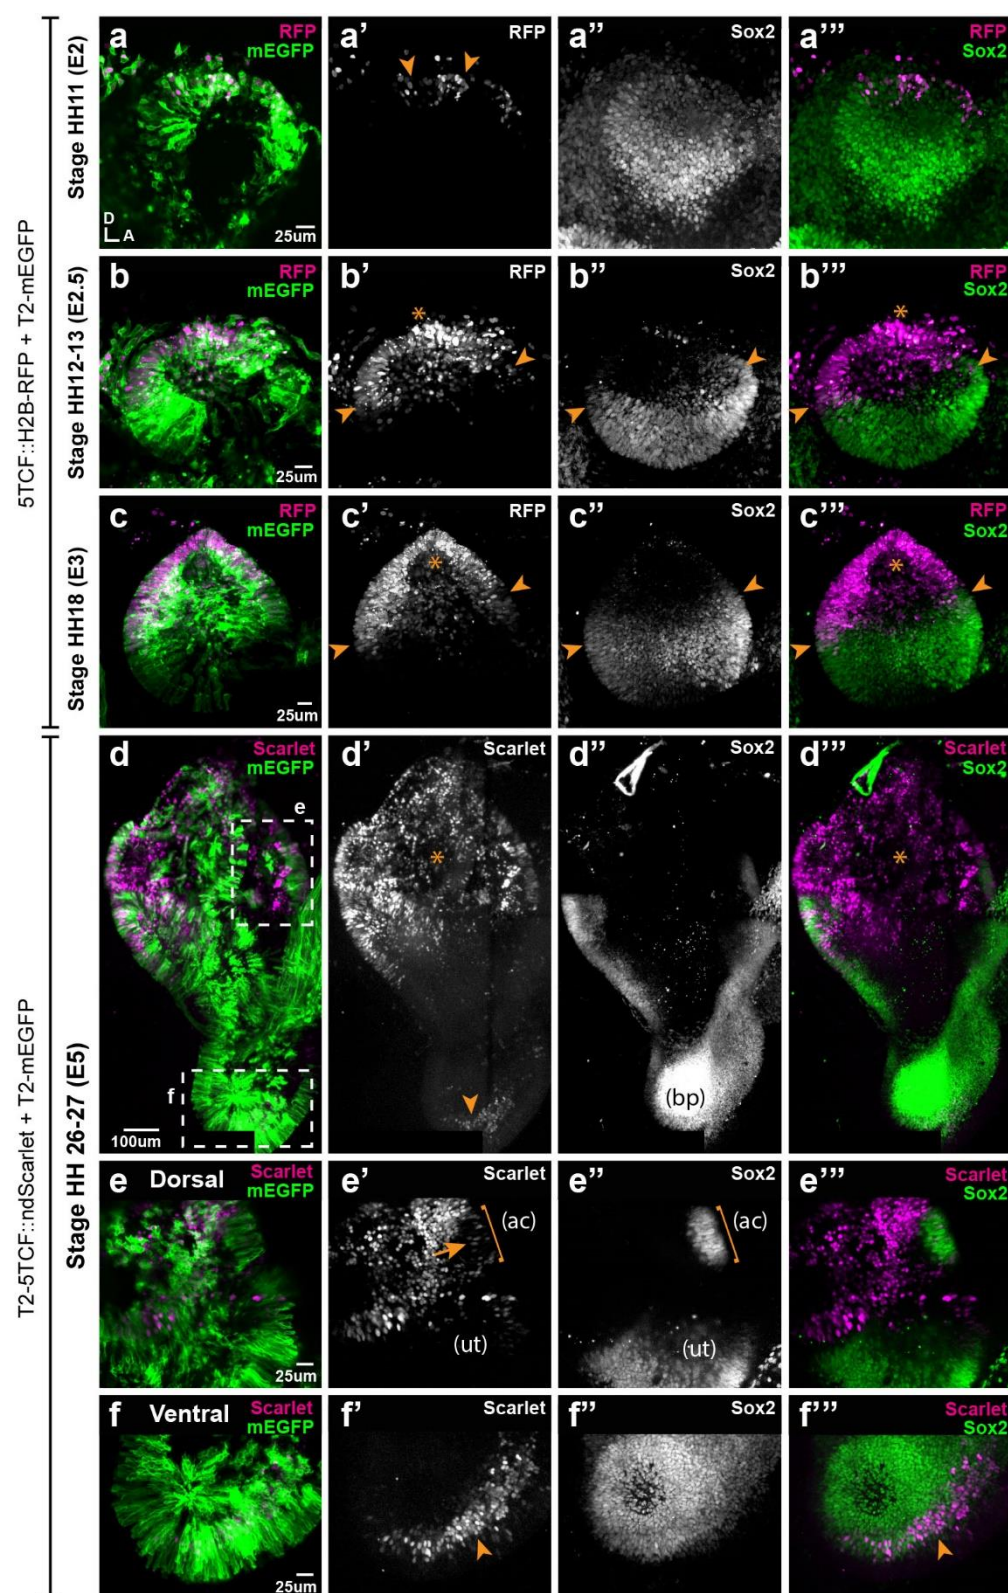



Figure 6.

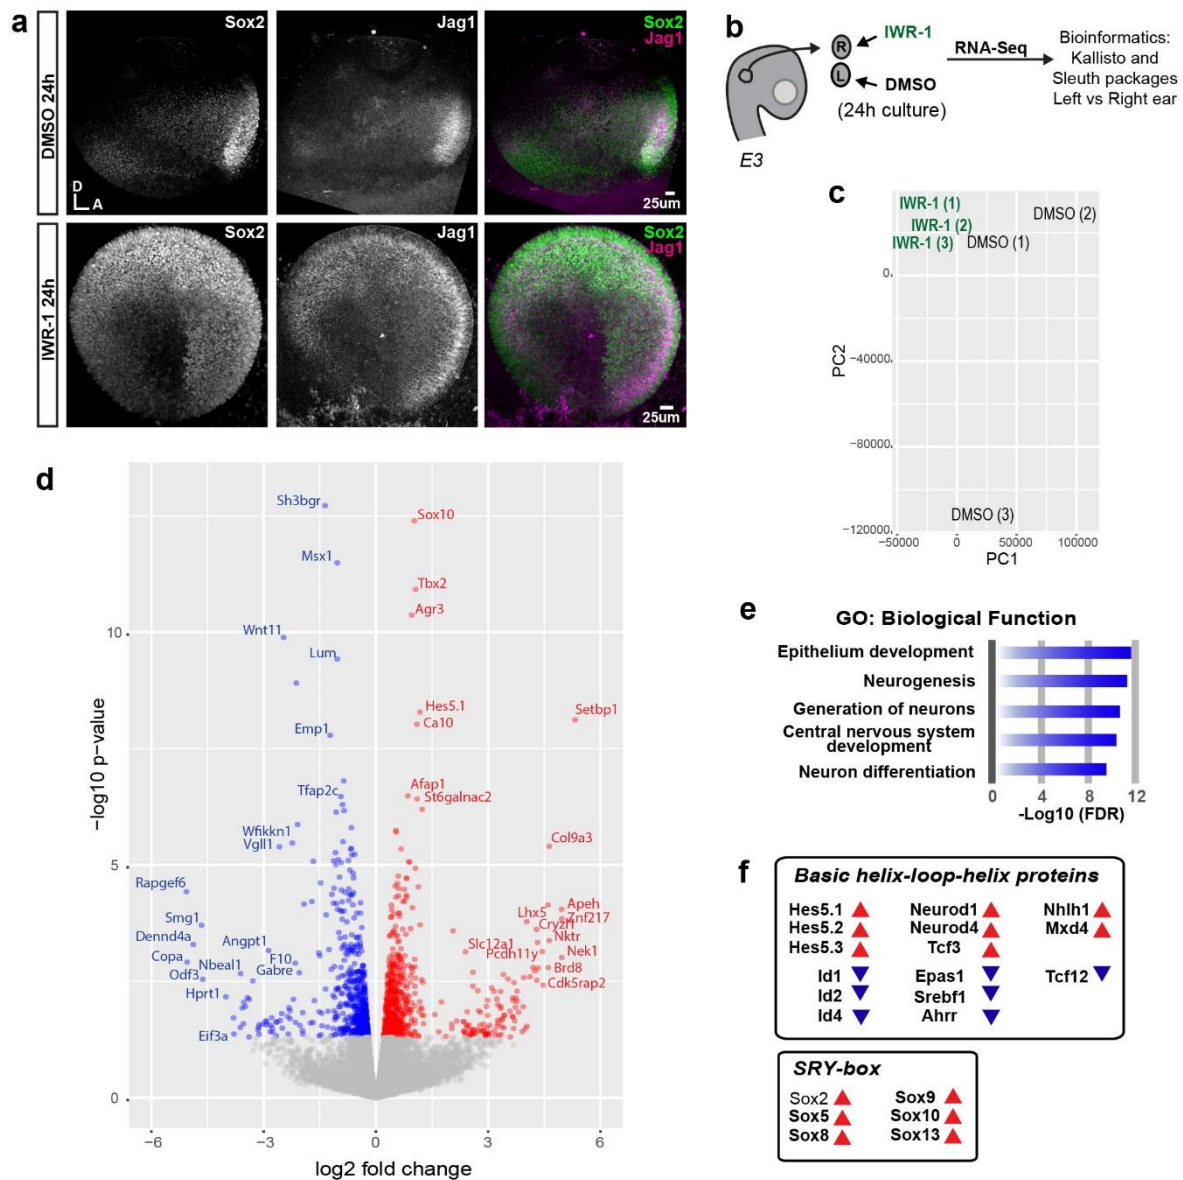

Figure 7.

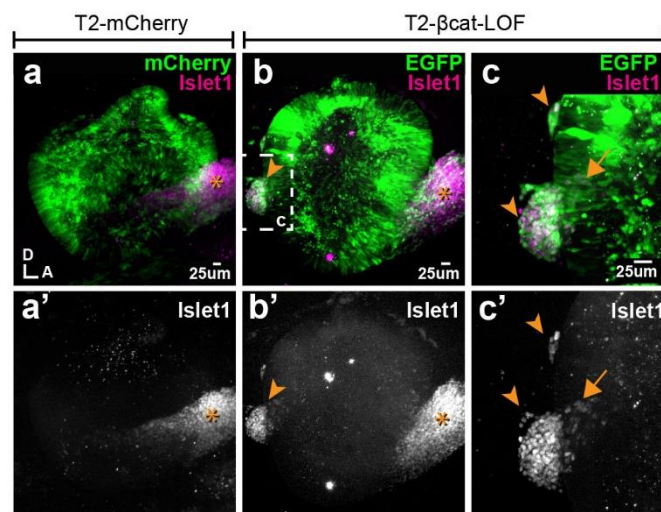

Figure 8.

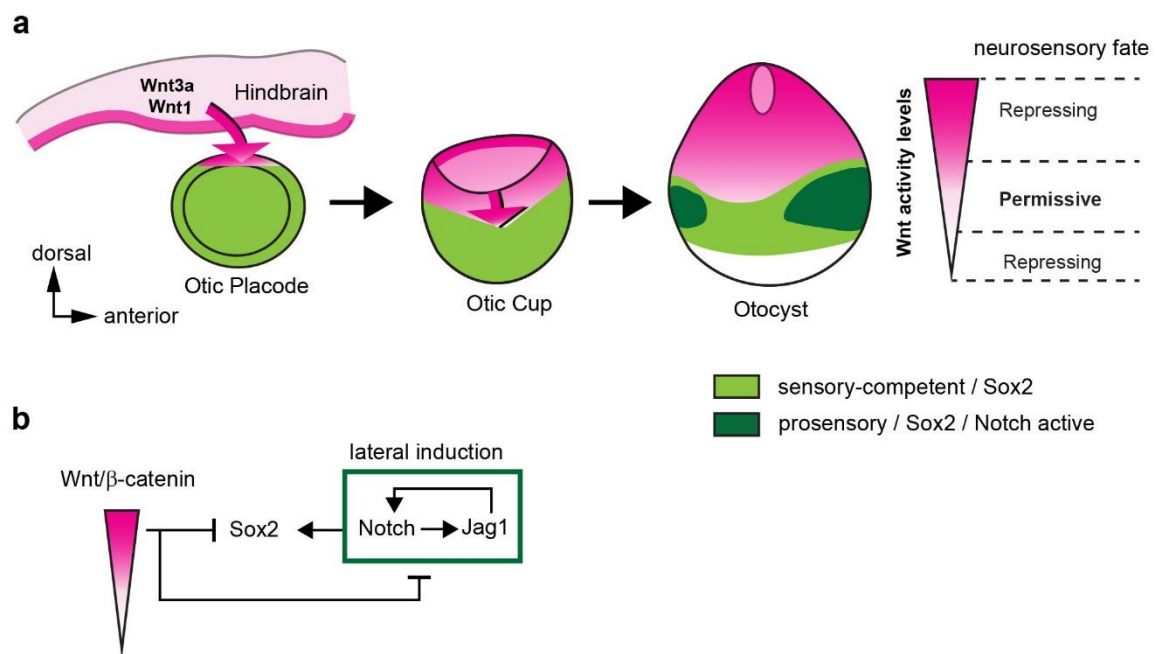

1 Sup figure 1.

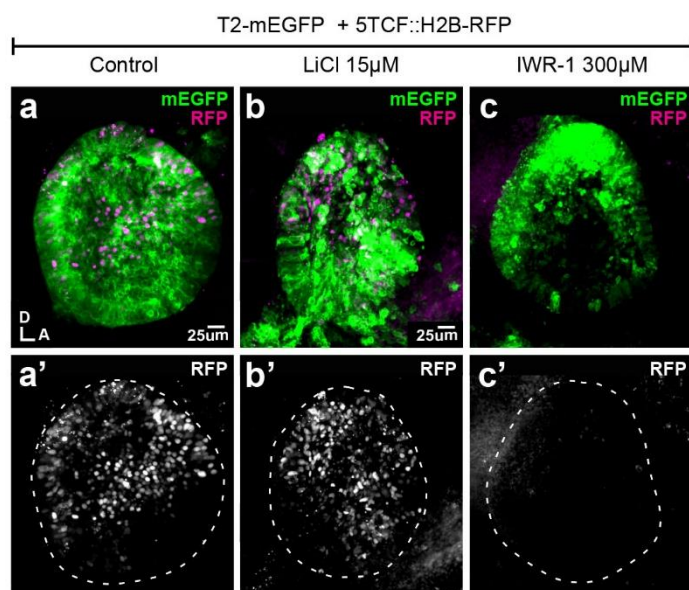

2

3

4

5 Sup figure 2.

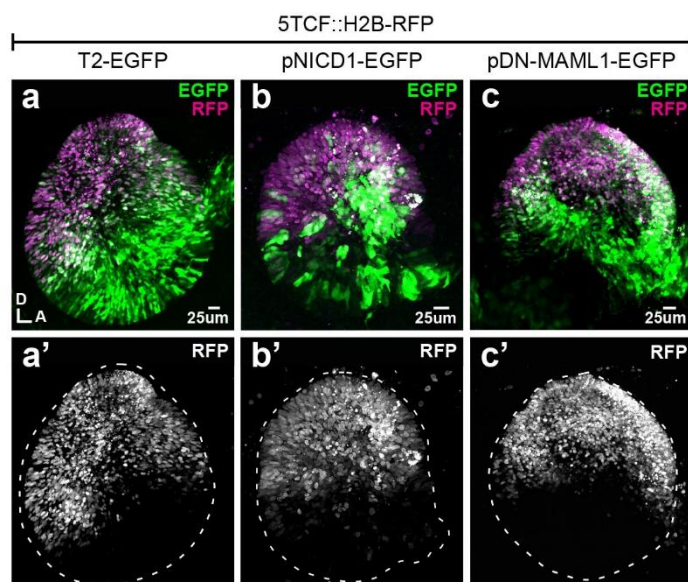

6

7

8

9

1 Sup figure 3.

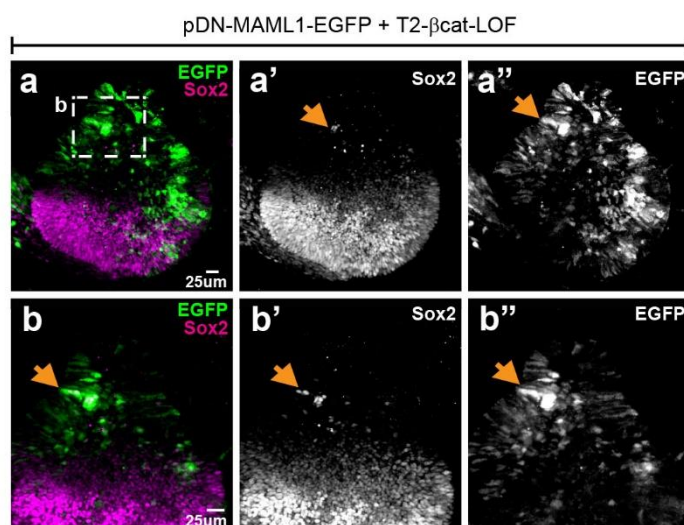

2

3

4

5 Sup figure 4.

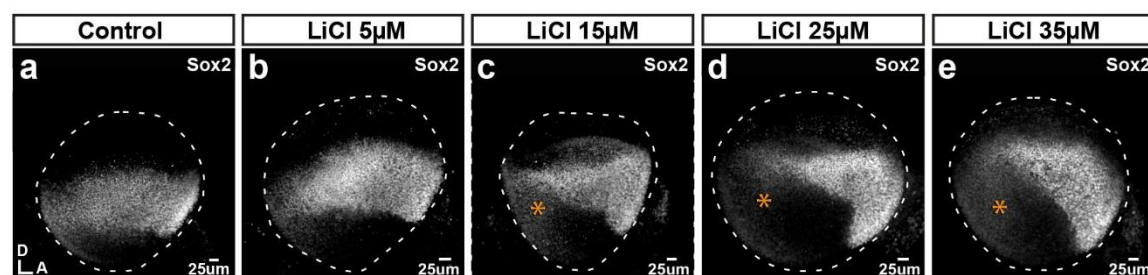

6

7
